# Supplementary material for: Effects of plant oils with different fatty acid composition on cardiovascular risk factors in moderately hypercholesteremic Chinese adults: a randomized, double-blinded, parallel-designed trial
Source: Royal Society of Chemistry journal article supplement (doi:10.1039/d0fo00875c), 2020-01-01
Supplement: d0fo00875c1.pdf [file d0fo00875c1.pdf]

Table S1 Summary of randomized control trials on ALA and cardiovascular risk factors compared with LA. Negative, no significant differences were found between ALA and LA groups; positive, ALA had different effects with LA.

| References | Location    | Subjects                                                                           | Sample size<br>(ALA/LA) | Intervention                   | Design                            | Dosage<br>g/d<br>(ALA/LA)             | Duration | Results                                                       |                                |
|------------|-------------|------------------------------------------------------------------------------------|-------------------------|--------------------------------|-----------------------------------|---------------------------------------|----------|---------------------------------------------------------------|--------------------------------|
|            |             |                                                                                    |                         |                                |                                   |                                       |          | negative                                                      | positive                       |
| [1, 2]     | Australia   | healthy young men                                                                  | 15/14                   | safflower oil<br>linseed oil   | parallel design<br>providing food | 10 ALA+12 LA /<br>1 ALA+21 LA         | 6 weeks  | blood lipids, coagulation ,<br>fibrinolysis                   |                                |
| [3]        | Netherlands | moderately<br>hypercholesterolaemic<br>subjects with two other<br>CVD risk factors | 114/168                 | margarine<br>with ALA or<br>LA | parallel design<br>freeliving     | 6.3 ALA+26.3 LA/<br>1.0 ALA+ 26.8 LA  | 2 years  | SBP, DBP,<br>TC, LDL-c<br>Von Willebrand factor               | HDL-c, TG<br>fibrinogen        |
| [4]        | Netherlands | moderately<br>hypercholesterolaemic<br>subjects with two other<br>CVD risk factors | 51/52                   | margarine<br>with ALA or<br>LA | parallel design<br>freeliving     | 5.9 ALA+23.9 LA/<br>1.1ALA+ 25.4LA    | 2 years  | IL-6, IL-10,<br>sICAM-1,<br>IMT                               | CRP                            |
| [5]        | Canada      | healthy men and women                                                              | 22/22                   | capsule                        | parallel design<br>freeliving     | 1.02 ALA+0.28 LA/<br>0.39 ALA+1.14 LA | 12 weeks | blood lipids, CRP, TNF-<br>$\alpha$ ,<br>platelet aggregation |                                |
| [6-8]      | Greece      | dyslipidaemic men                                                                  | 59/28                   | flaxseed oil<br>safflower oil  | parallel design<br>freeliving     | 8 ALA+2 LA /<br>11 LA                 | 12 weeks | SBP, blood lipids,<br>sICAM-1, sE-selectin,<br>sVCAM-1        | DBP, MAP,<br>CRP, SAA,<br>IL-6 |
| [9]        | Greece      | dyslipidaemic men                                                                  | 18/17                   | flaxseed oil<br>safflower oil  | parallel design<br>freeliving     | 8 ALA+2 LA /<br>11 LA                 | 12 weeks | blood lipids, TNF- $\alpha$ ,<br>adiponectin                  |                                |
| [10]       | Finland     | healthy men and women                                                              | 14/14                   | flaxseed oil<br>hempseed oil   | crossover design<br>freeliving    | 13.3 ALA+3.3 LA /<br>5.5 ALA+ 13.5 LA | 4 weeks  | blood lipids, glucose,<br>insulin, haemostatic<br>factors     | TC:HDL-c                       |

|               |                |                                          |          |                            |                                     |                                                               |          |                                                                                 |                    |
|---------------|----------------|------------------------------------------|----------|----------------------------|-------------------------------------|---------------------------------------------------------------|----------|---------------------------------------------------------------------------------|--------------------|
| [11]          | America        | hypercholesterolemic subjects            | 23/23    | flaxseed oil<br>walnut oil | crossover design<br>providing diets | 17 ALA+28 LA /<br>7 ALA+ 34 LA                                | 6 weeks  | blood lipids, CRP, ICAM-1,                                                      | VCAM-1, E-selectin |
| [12-14]       | United Kingdom | moderately hyperlipidaemic men and women | 30/30/29 | spread with<br>ALA or LA   | parallel design<br>freeliving       | 4.5 ALA+ 16.2 LA /<br>9.5 ALA+ 13.1 LA /<br>1.5 ALA + 22.9 LA | 6 months | blood lipids,<br>immune function,<br>blood coagulation,<br>fibrinolytic factors |                    |
| Present study | China          | moderately hyperlipidaemic men and women | 81/85    | blend oil<br>corn oil      | parallel design<br>freeliving       | 1.9 ALA+9.4 LA /<br>13.6 LA                                   | 1 year   | blood lipids, glucose,<br>insulin, CRP, IMT                                     |                    |

ALA, alpha-linolenic acid; LA, linoleic acid; sICAM-1, soluble intercellular adhesion molecule-1; sVCAM-1, soluble vascular cell adhesion molecule-1; CRP, C-reactive protein; IL-6, interleukins 6; IL-10, interleukins 6; TNF- $\alpha$ , tumor necrosis factor- $\alpha$ ; SAA, serum amyloid A; SBP, systolic blood pressure; DBP, diastolic blood pressure; MAP, mean arterial pressure; IMT, intima-media thickness.

1. Pang, D., et al., *Replacement of linoleic acid with alpha-linolenic acid does not alter blood lipids in normolipidaemic men*. Br J Nutr, 1998. **80**(2): p. 163-7.
2. Allman-Farinelli, M.A., et al., *Comparison of the effects of two low fat diets with different alpha-linolenic:linoleic acid ratios on coagulation and fibrinolysis*. Atherosclerosis, 1999. **142**(1): p. 159-68.
3. Bemelmans, W.J., et al., *Effect of an increased intake of alpha-linolenic acid and group nutritional education on cardiovascular risk factors: the Mediterranean Alpha-linolenic Enriched Groningen Dietary Intervention (MARGARIN) study*. Am J Clin Nutr, 2002. **75**(2): p. 221-7.
4. Bemelmans, W.J., et al., *Increased alpha-linolenic acid intake lowers C-reactive protein, but has no effect on markers of atherosclerosis*. Eur J Clin Nutr, 2004. **58**(7): p. 1083-9.
5. Kaul, N., et al., *A comparison of fish oil, flaxseed oil and hempseed oil supplementation on selected parameters of cardiovascular health in healthy volunteers*. J Am Coll Nutr, 2008. **27**(1): p. 51-8.
6. Rallidis, L.S., et al., *Dietary alpha-linolenic acid decreases C-reactive protein, serum amyloid A and interleukin-6 in dyslipidaemic patients*. Atherosclerosis, 2003. **167**(2): p. 237-42.
7. Rallidis, L.S., et al., *The effect of diet enriched with alpha-linolenic acid on soluble cellular adhesion molecules in dyslipidaemic patients*. Atherosclerosis, 2004. **174**(1):

p. 127-32.

8. Paschos, G.K., et al., *Dietary supplementation with flaxseed oil lowers blood pressure in dyslipidaemic patients*. Eur J Clin Nutr, 2007. **61**(10): p. 1201-6.
9. Paschos, G.K., et al., *Effects of flaxseed oil supplementation on plasma adiponectin levels in dyslipidemic men*. Eur J Nutr, 2007. **46**(6): p. 315-20.
10. Schwab, U.S., et al., *Effects of hempseed and flaxseed oils on the profile of serum lipids, serum total and lipoprotein lipid concentrations and haemostatic factors*. Eur J Nutr, 2006. **45**(8): p. 470-7.
11. Zhao, G., et al., *Dietary alpha-linolenic acid reduces inflammatory and lipid cardiovascular risk factors in hypercholesterolemic men and women*. J Nutr, 2004. **134**(11): p. 2991-7.
12. Finnegan, Y.E., et al., *Plant and marine derived (n-3) polyunsaturated fatty acids do not affect blood coagulation and fibrinolytic factors in moderately hyperlipidemic humans*. Journal of Nutrition, 2003. **133**(7): p. 2210-2213.
13. Kew, S., et al., *Lack of effect of foods enriched with plant- or marine-derived n-3 fatty acids on human immune function*. American Journal of Clinical Nutrition, 2003. **77**(5): p. 1287-1295.
14. Finnegan, Y.E., et al., *Plant- and marine-derived n-3 polyunsaturated fatty acids have differential effects on fasting and postprandial blood lipid concentrations and on the susceptibility of LDL to oxidative modification in moderately hyperlipidemic subjects*. American Journal of Clinical Nutrition, 2003. **77**(4): p. 783-795.
